24 **Abstract**

25 Walking movements are orchestrated by the activation of a large number of muscles. The  
26 control of numerous muscles during walking is believed to be simplified by flexible activation  
27 of groups of muscles called muscle synergies. Although significant corticomuscular  
28 connectivity during walking has been reported, the level at which the cortex controls locomotor  
29 muscle activity (i.e., muscle synergy or individual muscle level) remains unclear. Here, we  
30 examined cortical involvement in muscle control during walking by brain decoding of the  
31 activation of muscle synergies and individual muscles from electroencephalographic (EEG)  
32 signals using linear decoder models. First, we demonstrated that activation of locomotor muscle  
33 synergies was decoded from slow cortical waves with significant accuracy. In addition, we  
34 found that decoding accuracy for muscle synergy activation was greater than that for individual  
35 muscle activation and that decoding of individual muscle activation was based on muscle  
36 synergy-related cortical information. Taken together, these results provide indirect evidence that  
37 the cerebral cortex hierarchically controls multiple muscles through a few muscle synergies  
38 during walking. Our findings extend the current understanding of the role of the cortex in  
39 muscular control during walking and could accelerate the development of effective  
40 brain-machine interfaces for people with locomotor disabilities.

41

42

43

44

45

46

47

48

49

50

## 51 **Introduction**

52           Human locomotor movement is organized by the coordinated activation of a large  
53 number of muscles. It has been suggested that complex muscle activity is generated from a  
54 small number of groups of muscle activations called muscle synergies [1-5]. Locomotor muscle  
55 synergies are thought to be structured in the spinal circuitry [6, 7]. Based on previous studies  
56 examining synergy activation among different subject groups, it has been suggested that the  
57 cortex activates locomotor muscle synergies [1, 2, 7]. These studies reported that locomotor  
58 muscle synergy in healthy adults exhibited activation that was sharply timed around gait events  
59 [1], whereas locomotor muscle synergy in neonates [2] and complete spinal cord injury (SCI)  
60 patients [7] exhibited smooth prolonged activation. The differences in the patterns in neonates  
61 and SCI patients could be caused by immature and injured corticospinal pathways, respectively.  
62 Based on these findings, it is thought that cortical descending commands modulate basic  
63 locomotor muscle synergy activation generated by subcortical structures, particularly in the  
64 spinal cord. However, there is currently no direct evidence of cortico-muscle synergy  
65 relationships supported by simultaneous recordings of cortical activity and muscle synergy  
66 activation during walking.

67           Unlike quadruped animals [8, 9], human bipedal walking is characterized by  
68 significant cortical activity even during undemanding steady-state walking [10-19]. Significant  
69 cortical activation has been demonstrated previously in premotor, supplementary motor, and  
70 primary sensorimotor regions during real and imagined walking using neuroimaging techniques  
71 such as positron emission tomography (PET) and near-infrared spectroscopy (NIRS) [11, 12].  
72 Recent studies using electroencephalography (EEG), which has greater temporal resolution,  
73 have demonstrated gait-phase dependent modulation of cortical activity, particularly in the  
74 sensorimotor cortex, using a combined method of independent component analysis and source  
75 localization techniques [13-17]. Other EEG studies have demonstrated significant  
76 corticomuscular connectivity between the leg sensorimotor area and leg muscles during walking

77 using individual muscle level analysis [18, 19]. Although these studies strongly suggest cortical  
78 involvement in muscular control during walking, at what level the cortex controls muscle  
79 activity remains unclear, i.e., at muscle synergies or individual muscles.

80 To address the question, we hypothesized that the human cortex controls locomotor  
81 muscle activity through muscle synergies, rather than through direct control of each muscle and,  
82 then, examined how the cortex is involved in muscle control during walking by decoding the  
83 activations of muscle synergies and individual muscles from EEG signals. Brain decoding  
84 techniques, which predict the mental or motor state of a human from recorded brain signals,  
85 have received substantial attention for the development of brain-machine interfaces (BMIs) for  
86 repairing or assisting deficits in cognitive or sensory-motor functions [20-22]. In addition to  
87 potentially restoring lost functions, neural decoding can provide information on the  
88 physiological principles of how motor movements are controlled by the brain [23].

89 In this study, using neural decoding techniques, we demonstrate that the activation of  
90 muscle synergies can be decoded from cortical activity and that the decoding accuracy for  
91 muscle synergies is greater than that for individual muscles. Additionally, we show the  
92 decoding of individual muscle activity is based on muscle synergy related cortical information.  
93 These results provide experimental evidence that the cortex hierarchically controls individual  
94 muscles through locomotor muscle synergies. The findings will shed light on the cortex's role  
95 in muscular control during walking and provide an important basis for developing effective  
96 neuroprostheses for walking rehabilitation.

97

## 98 **Results**

99 Healthy participants walked on a treadmill at 0.55 m/s for 7 min 30 seconds. Surface  
100 electromyographic (EMG) signals were recorded from 13 leg muscles on the right side. EEG  
101 signals were recorded from 63 channels. EEG data from 30 channels (Figure 1), which are  
102 assumed to be less affected by eye blinks and facial/cranial muscle activity, were used for

103 subsequent analysis. Using the EMG and EEG signals, we tried to decode individual muscle and  
104 muscle synergy activations from cortical activity. See Figure 2 for an overview of our decoding  
105 methodology.

106

### 107 **Extracted locomotor muscle synergies**

108 The recorded EMGs were rectified and smoothed by a low-pass filter. Next, using non-negative  
109 matrix factorization (NMF) [2, 3, 24-26], muscle synergies were extracted from each participant.  
110 From the low-pass filtered EMGs,  $4.17 \pm 0.58$  (mean  $\pm$  SD) muscle synergies were extracted  
111 from each participant. The extracted muscle synergies were grouped into five types using  
112 cluster analysis (synergy A–E, Figure 3). Supplemental Table S1 summarizes the characteristics  
113 of the extracted locomotor muscle synergies.

114

### 115 **Neural decoding of activation of muscle synergies and individual muscles from** 116 **EEG signals**

117 As preparation for neural decoding, recorded EEG signals were band-pass filtered in  
118 the delta band (0.5-4Hz). The filtered signals, which are called slow cortical potentials, were  
119 confirmed to be particularly informative for decoding motor-related parameters [27-32]. We  
120 used multiple linear models, also referred to as Wiener filter, to decode individual muscle and  
121 muscle synergy activations from the slow cortical potentials, as used in previous studies  
122 decoding motor parameters [27-32]. Figure 4 provides examples of real and reconstructed  
123 muscle synergy activations (Figure 4A) and individual muscle activations (Figure 4B) from a  
124 participant. In this participant, all locomotor muscle synergy activations were successfully  
125 reconstructed based on visual inspection (Figure 4A). In contrast, in individual muscle  
126 activation, the amplitude modulation was not sufficiently reconstructed in some muscles, such  
127 as SART, AM, PL, SOL (Figure 4B).

128           To quantify decoding accuracy, we calculated the Pearson's correlation coefficients  
129 ( $r$ ) between the real and reconstructed activations in each decoder (Figure 5). The mean values  
130 across the participants ranged from 0.48 to 0.52 in muscle synergy decoders and 0.31 to 0.52 in  
131 individual muscle decoders (Figure 5A). The overall accuracy (i.e., averaged correlation values  
132 across all decoders in each type [muscle synergy or individual muscle]) of the muscle synergy  
133 decoder was higher than that of the individual muscle decoder ( $t(11) = 5.30$ ,  $p = 0.0003$ , paired  
134 t-test, Figure 5B).

135           Next, to validate the results of neural decoding, the same decoding process was  
136 performed on phase-randomized EEG signals to estimate the chance levels. We generated 100  
137 surrogate datasets and evaluated the mean and 95% confidence intervals of the decoding  
138 accuracy from the distribution of decoding accuracy of the surrogate datasets (Figure 5C). The  
139 decoding accuracy from the phase-randomized data was low regardless of the type of muscle  
140 synergies or individual muscles (range of mean  $r$  values: 0.0085–0.025). The decoding accuracy  
141 from the original EEGs exceeded the 95% confidence interval of the surrogate datasets for all  
142 muscle synergy and individual muscle decoders in all the participants.

143

#### 144 **Relationships between muscle synergy decoders and individual muscle decoders**

145           Although the decoding accuracy of muscle synergy activation was similar for all  
146 synergy types, the decoding accuracy of individual muscle decoders varied widely across  
147 different muscles (Figure 5A). In this study, the cortex is assumed to be involved in muscle  
148 control through muscle synergies. Based on this assumption, the variability of decoding  
149 accuracy in individual muscles would be reproduced by individual muscle activations indirectly  
150 decoded from muscle synergy activations decoded from muscle synergy decoders. To test this  
151 hypothesis, we reconstructed individual muscle activations by summing the outputs of each  
152 decoded muscle synergy (Figure 6A). The decoding accuracy of directly decoded individual

153 muscle activations was found to have a very strong positive correlation with that indirectly  
154 decoded from the outputs of decoded muscle synergies ( $r = 0.97$ , Figure 6B). This result  
155 indicates that if muscle activation is not well decoded through decoded muscle synergies, the  
156 decoding accuracy of the muscle will be low even when it is directly decoded.

157         The decoding accuracy relationships suggest that decoding of individual muscle  
158 activation is based on muscle synergy-related cortical information. If so, the weights of the  
159 individual muscle decoders ( $W_{muscle}$ ) should be represented as a linear combination of those of  
160 muscle synergy decoders ( $W_{syn}$ ) with non-negative coefficients. To test this possibility,  
161 300-dimensional weights of an individual muscle decoder were reconstructed as a linear  
162 combination of the weights of muscle synergy decoders with non-negative coefficients ( $W_{muscle}'$ ,  
163 conceptual schema presented in Figure 6C). The similarity between the original and  
164 reconstructed weights (i.e.,  $W_{muscle}$  and  $W_{muscle}'$ , respectively) was quantified by Pearson's  
165 correlation coefficient, which was  $0.91 \pm 0.11$  (mean  $\pm$  SD) across all muscles of all the  
166 participants. Regarding each type of muscle, the mean similarity values across participants  
167 ranged from 0.77 to 0.99 (Figure 6D). Thus, as expected, the weights of individual muscle  
168 decoders represented very similar patterns as those reconstructed from the weights of muscle  
169 synergy decoders.

170

## 171 **Contributions of electrodes to neural decoding**

172 To evaluate the spatial contributions of cortical activity for predicting muscle synergy  
173 activations, we calculated the contribution of each electrode from the weights of the decoding  
174 model [33]. Figure 7A shows examples of the contributions of each electrode to the decoding in  
175 one participant. In this participant, the contribution of each electrode was approximately 7% at  
176 the highest. Thus, widely-distributed cortical activity, rather than activity from one specific  
177 electrode and area, contributed to decoding. The widely-distributed contribution of the whole  
178 cortex was also observed in the mean contribution in each type of synergy (Figure 7B).

179           These results suggest that broad cortical activity is involved in the control of  
180 locomotor muscle synergy. To further validate the widely-distributed contribution of cortical  
181 activity to the decoding of locomotor muscle synergy, we divided the electrodes into four major  
182 regions of interest (ROIs), namely frontal, central, lateral, and parietal ROIs (Figure 7C). Next,  
183 for each ROI, we performed the same decoding procedure used for all electrodes and compared  
184 the decoding accuracies. The comparisons of the decoding accuracy did not show any  
185 significant differences among ROIs, except for that between the central and parietal ROIs in  
186 synergy E (Figure 7D). Nevertheless, the decoding accuracy in the full electrodes was  
187 significantly higher than that in each ROI (Figure 7D,  $p < 0.05$ , False discovery rate (FDR)  
188 corrected for multiple comparisons, see Table S2–S6 for detailed statistical values).  
189 Interestingly, the mean decoding accuracy of the central ROI was the largest for all synergy  
190 types except synergy C, and a significantly higher accuracy was found in the central ROI  
191 compared to the parietal ROI for synergy E (Figure 7D,  $p = 0.020$ , FDR corrected for multiple  
192 comparisons).

193

## 194 **Discussion**

### 195 **Cortical control of locomotor muscle synergy**

196 The last 15 years of research has suggested that cortical descending commands modulate basic  
197 locomotor muscle synergy activation generated by subcortical structures [1, 2, 7, 25].  
198 Nevertheless, currently, there has been no evidence of cortical control of locomotor muscle  
199 synergies from simultaneously recorded cortical and muscle activity. In this study, we revealed  
200 that activation of locomotor muscle synergies decoded from EEGs was moderately correlated  
201 with real activation (Figure 5A), and that decoding accuracy of muscle synergy activation was  
202 generally higher than that of individual muscle activation (Figure 5B). By examining the  
203 relationships between individual muscle and muscle synergy decoders, we also showed that the



204 decoding of individual muscle activity is based on muscle synergy-related cortical information  
205 (Figures 6B and 6D). Combined, the decoding results demonstrate significant cortico-muscle  
206 synergy relationships during walking, thus supporting the hypothesis that the human cortex  
207 hierarchically controls locomotor muscle activity through muscle synergies rather than by  
208 directly controlling each muscle [34].

209           Regarding cortical control of locomotor muscle synergies in a stroke-injured  
210 neuromuscular system, fewer locomotor muscle synergies resulting from the merging of healthy  
211 muscle synergies are recruited, which reflect disruption in the corticospinal descending  
212 pathways [25]. Therefore, post-stroke changes suggest cortical involvement in the activation of  
213 the locomotor muscle synergies. Other evidence regarding the cortical control of locomotor  
214 muscle synergies has been suggested by altered activation of the muscle synergies in patients  
215 with complete SCI [7] and neonates [2]. Both subject groups exhibited smooth sinusoidal-like  
216 activation patterns of locomotor muscle synergies rather than sharply timed activation, which  
217 was observed in healthy subjects [1, 35]. The sinusoidal-like activation patterns were also  
218 observed in other mammals [2]. Based on lack of corticospinal interactions in SCI patients and  
219 neonates, this similarity may suggest that the sinusoidal-like activation patterns are  
220 phylogenetically conserved in the spinal circuits. Taken together, it is possible that cortical  
221 descending commands modulate basic locomotor muscle synergy activation patterns generated  
222 by the spinal cord into the sophisticated patterns underlying human-specific upright bipedal  
223 walking.

224           The decoded muscle synergy activation observed here exhibited moderate correlation  
225 with actual activation (Figure 5). This moderate decoding accuracy is expected to derive from  
226 muscle synergy recruitment via multiple neural pathways, such as the brainstem, spinal cord,  
227 and sensory feedback [34, 36, 37] in addition to the cortex. Although the cortex is likely to be  
228 involved in the control of locomotor muscle synergies, its contribution may not be exclusively  
229 dominant. Partial contribution of the cortex to the control of locomotor muscle synergies may  
230 explain the moderate decoding accuracy observed in this study.

231

## 232 **Global cortical involvement in control of locomotor muscle synergies**

233 Widely-distributed cortical activity, rather than activity from a specific electrode or area,  
234 contributed to decoding (Figure 7). Similarly, previous studies of neural decoding while  
235 walking demonstrated that leg kinematics could be decoded from cortical signals from  
236 widely-distributed regions [27, 28]. Previous work has shown the contributions of widespread  
237 cortical circuits, including the posterior parietal cortex, motor cortex, somatosensory cortex, and  
238 visual cortex, to visually guided walking in cats [38]. Although the contribution of widespread  
239 cortical circuits is limited to challenging walking conditions in cats, such circuits may  
240 contribute to the control of human walking even during steady-state walking because the  
241 mechanical instability of human-specific bipedal walking [39] requires additional cortical  
242 involvement. Indeed, widespread cortical activity has been reported during human walking by  
243 source estimation of EEG signals [13, 40]. In addition, motor imagery studies have  
244 demonstrated locomotor-related activity in brain regions including the primary and  
245 supplementary motor cortex and several bilateral parietal and frontal regions using functional  
246 magnetic resonance imaging (fMRI) [41, 42]. Thus, it is possible that locomotor-related global  
247 activity in the cortex can explain the widely-distributed contribution of electrodes to the  
248 decoding of locomotor muscle synergy activations in the present study.

249         Of note, the mean decoding accuracy of the central ROI was highest among all ROIs  
250 in all synergy types except one, and significantly higher accuracy was found in the central ROI  
251 compared to the parietal ROI in one synergy type (Figure 7D). Since the central ROI covers the  
252 sensorimotor area, it should contain more information about the control of locomotor muscle  
253 synergy than the other ROIs. A previous study using transcranial magnetic stimulation and  
254 fMRI demonstrated that motor cortical regions activate muscle synergies of the leg and pelvic  
255 floor muscles, and that the regions have functional connectivity to widespread brain regions  
256 [43]. Based on these results and the results of the previous study, motor cortical regions with

257 widespread cortical networks may be involved in the control of muscle synergies for leg  
258 muscles during walking, as well as the synergies of leg and pelvic floor muscles [43].

259

## 260 **Roles of slow cortical potentials in sensorimotor control**

261 In the present study, slow cortical potentials in the delta band (0.5–4 Hz) were used  
262 for our neural decoding method. Although such low-frequency cortical activity is associated  
263 with sleep [44], recent studies suggest that low-frequency cortical activity contains  
264 sensorimotor-related information. For example, delta band cortical activity plays a role in  
265 decision-making about somatosensory discrimination [45] and prediction of sensory events [46].  
266 Additionally, neural decoding studies in humans have demonstrated that delta band activity is  
267 particularly informative for decoding kinematics parameters [27-32] and muscle activity [30]. In  
268 recent rodent studies, multisensory integration in widespread brain networks through slow  
269 cortical waves was suggested by calcium imaging [47]. As more direct evidence, a study on  
270 monkeys revealed intrinsic cyclic activity of slow cortical waves, functioning much like a spinal  
271 central pattern generator for locomotion, in the motor cortex and that slow waves synchronized  
272 upper-limb movements and muscle activity [48]. In addition, they demonstrated the slow  
273 cortical dynamics during sleep and under sedation. Given the task commonality between  
274 upper-limb movement and sleep, it is possible that the slow cortical dynamics are shared with  
275 walking. If the above-mentioned roles of slow cortical waves are conserved in humans, slow  
276 cortical waves may integrate muscle-synergy-related sensor information and be synchronized to  
277 muscle synergy activations. Therefore, locomotor muscle synergy activations could be decoded  
278 from slow waves in this study.

279

## 280 **Applicability to brain-machine interfaces**

281 The decoding methodology and results of this study could contribute to the development of  
282 more effective locomotor rehabilitation approaches for patients with neural disorders. Recently,

283 brain-machine interface (BMI) systems, which control stimulators that activate muscles through  
284 functional electrical stimulation (FES) based on cortical signals, have been used to aid recovery  
285 of movement in impaired patients [49]. As a new stimulation pattern of FES, muscle  
286 synergy-based stimulation patterns have been suggested for upper limb reaching [50] and  
287 locomotion [51]. The present results indicate that EEG signals contain information about the  
288 control of locomotor muscle synergies, providing fundamental information for effective  
289 neuroprosthetic systems based on a novel approach (e.g., BMI-FES with muscle synergy-based  
290 stimulation patterns) for restoring locomotion.

291

## 292 **Methodological considerations**

293 Although EEG is a suitable method for examining brain activity during walking because of its  
294 high temporal resolution and mobility, the potential effects of movement artifacts should be  
295 considered. A recent study examined gait movement-related artifacts in EEG data by blocking  
296 the recording of electrophysiological signals (brain, eye, heart, and muscle activity) using a  
297 nonconductive layer (silicone swim cap) [52] and demonstrated that artifacts were smaller in  
298 electrodes in the central region (i.e., the vertex) compared with peripheral regions, because  
299 movement artifacts were caused by vertical head acceleration. In the present study,  
300 widely-distributed cortical activity, including that from central regions and peripheral regions  
301 (Figure 7A, 7B, and 7C), contributed to decoding. In addition, contribution to the decoding of  
302 central region ROI was larger than that of a peripheral ROI in a synergy type (Figure 7C). Thus,  
303 movement artifacts are not expected to have a major impact on the results.

304 Last, we used a primary components analysis (PCA)-based artifact rejection  
305 algorithm (ASR) to remove movement artifacts and other artifacts derived from muscle, heart,  
306 and eye activity. The ASR method removes high-variance artifact components from a dataset by  
307 comparison with a resting dataset [53]. This method has been utilized in studies recording EEG  
308 signals during walking, and its effectiveness has been confirmed in several studies [54, 55].

309 Therefore, the effects of movement artifacts on the current decoding results are not expected to  
310 be large.

311

## 312 **Conclusions**

313 We demonstrated that low-frequency cortical waves are informative for the decoding of muscle  
314 synergy activity during walking, and that the decoding of individual muscle activity is based on  
315 muscle synergy-related cortical information. These results suggest that the cortex hierarchically  
316 controls locomotor muscle activity through muscle synergies. These novel findings advance our  
317 understanding of the neural control of human bipedal locomotion. Moreover, they demonstrate  
318 the feasibility of neural decoding of muscle synergy activation, supporting its future  
319 contribution to the development of effective brain-muscle neuroprostheses to restore walking in  
320 patients with mobility limitations.

321

## 322 **Acknowledgements**

323 This work was supported by a Grant-in-Aid for Japan Society for the Promotion of Science  
324 Fellows (JSPS, #15J09583) to H.Y., Grant-in-Aid for Scientific Research (A) from JSPS to K.N.  
325 (#18H00818) and the Core Research for Evolutional Science and Technology (CREST) from  
326 Japan Science and Technology Agency (JST) to K.W. and K. N. (#JPMJCR14E4).

327

## 328 **Author Contributions**

329 H.Y. and K.N. designed the experiment. H.Y. designed the current data analysis strategy. H.Y.  
330 and N.K. collected data. H.Y. performed analyses. H.Y., T.O., and K. N. drafted the manuscript.  
331 All authors interpreted the data, discussed the findings, and approved the final version of the  
332 manuscript

333

## 334 **Declaration of Interests**

335 The authors declare no competing interests.

336

337

## 338 References

339

340 1. Ivanenko, Y.P., Poppele, R.E., and Lacquaniti, F. (2004). Five basic muscle activation  
341 patterns account for muscle activity during human locomotion. *J. Physiol.* 556,  
342 267-282.

343 2. Dominici, N., Ivanenko, Y.P., Cappellini, G., d'Avella, A., Mondì, V., Cicchese, M.,  
344 Fabiano, A., Silei, T., Di Paolo, A., Giannini, C., et al. (2011). Locomotor primitives in  
345 newborn babies and their development. *Science* 334, 997-999.

346 3. Yokoyama, H., Ogawa, T., Kawashima, N., Shinya, M., and Nakazawa, K. (2016).  
347 Distinct sets of locomotor modules control the speed and modes of human locomotion.  
348 *Sci. Rep.* 6, 36275.

349 4. d'Avella, A., Saltiel, P., and Bizzi, E. (2003). Combinations of muscle synergies in the  
350 construction of a natural motor behavior. *Nat. Neurosci.* 6, 300-308.

351 5. Tresch, M.C., Saltiel, P., and Bizzi, E. (1999). The construction of movement by the  
352 spinal cord. *Nat. Neurosci.* 2, 162-167.

353 6. McCrea, D.A., and Rybak, I.A. (2008). Organization of mammalian locomotor rhythm  
354 and pattern generation. *Brain Res. Rev.* 57, 134-146.

355 7. Danner, S.M., Hofstoetter, U.S., Freundl, B., Binder, H., Mayr, W., Rattay, F., and  
356 Minassian, K. (2015). Human spinal locomotor control is based on flexibly organized  
357 burst generators. *Brain* 138, 577-588.

358 8. Armstrong, D.M. (1988). The supraspinal control of mammalian locomotion. *J. Physiol.*  
359 405, 1-37.

360 9. Drew, T., Kalaska, J., and Krouchev, N. (2008). Muscle synergies during locomotion in  
361 the cat: a model for motor cortex control. *J. Physiol.* 586, 1239-1245.

362 10. Yang, J.F., and Gorassini, M. (2006). Spinal and brain control of human walking:  
363 implications for retraining of walking. *Neuroscientist* 12, 379-389.

364 11. Miyai, I., Tanabe, H.C., Sase, I., Eda, H., Oda, I., Konishi, I., Tsunazawa, Y., Suzuki, T.,  
365 Yanagida, T., and Kubota, K. (2001). Cortical mapping of gait in humans: a  
366 near-infrared spectroscopic topography study. *Neuroimage* 14, 1186-1192.

367 12. La Fougere, C., Zwergal, A., Rominger, A., Förster, S., Fesl, G., Dieterich, M., Brandt,  
368 T., Strupp, M., Bartenstein, P., and Jahn, K. (2010). Real versus imagined locomotion: a  
369 [18 F]-FDG PET-fMRI comparison. *Neuroimage* 50, 1589-1598.

370 13. Gwin, J.T., Gramann, K., Makeig, S., and Ferris, D.P. (2011). Electro cortical activity is  
371 coupled to gait cycle phase during treadmill walking. *Neuroimage* 54, 1289-1296.

372 14. Wagner, J., Solis-Escalante, T., Grieshofer, P., Neuper, C., Müller-Putz, G., and Scherer,  
373 R. (2012). Level of participation in robotic-assisted treadmill walking modulates  
374 midline sensorimotor EEG rhythms in able-bodied subjects. *Neuroimage* 63,  
375 1203-1211.

376 15. Bruijn, S.M., Van Dieën, J.H., and Daffertshofer, A. (2015). Beta activity in the  
377 premotor cortex is increased during stabilized as compared to normal walking. *Front.*  
378 *Hum. Neurosci.* 9, 593.

379 16. Bradford, J.C., Lukos, J.R., and Ferris, D.P. (2016). Electro cortical activity  
380 distinguishes between uphill and level walking in humans. *J. Neurophysiol.* 115,  
381 958-66.

382 17. Seeber, M., Scherer, R., Wagner, J., Solis-Escalante, T., and Müller-Putz, G.R. (2015).  
383 High and low gamma EEG oscillations in central sensorimotor areas are conversely

- 384 modulated during the human gait cycle. *NeuroImage* *112*, 318-326.
- 385 18. Artoni, F., Fanciullacci, C., Bertolucci, F., Panarese, A., Makeig, S., Micera, S., and  
386 Chisari, C. (2017). Unidirectional brain to muscle connectivity reveals motor cortex  
387 control of leg muscles during stereotyped walking. *Neuroimage* *59*, 403-416.
- 388 19. Petersen, T.H., Willerslev - Olsen, M., Conway, B.A., and Nielsen, J.B. (2012). The  
389 motor cortex drives the muscles during walking in human subjects. *J. Physiol.* *590*,  
390 2443-2452.
- 391 20. Lebedev, M.A., and Nicolelis, M.A. (2017). Brain-Machine Interfaces: From Basic  
392 Science to Neuroprostheses and Neurorehabilitation. *Physiol. Rev.* *97*, 767-837.
- 393 21. Lebedev, M.A., and Nicolelis, M.A. (2006). Brain-machine interfaces: past, present and  
394 future. *Trends Neurosci.* *29*, 536-546.
- 395 22. Patil, P.G., and Turner, D.A. (2008). The development of brain-machine interface  
396 neuroprosthetic devices. *Neurotherapeutics* *5*, 137-146.
- 397 23. Nicolelis, M.A. (2003). Brain-machine interfaces to restore motor function and probe  
398 neural circuits. *Nat. Rev. Neurosci.* *4*, 417-422.
- 399 24. Lee, D.D., and Seung, H.S. (1999). Learning the parts of objects by non-negative matrix  
400 factorization. *Nature* *401*, 788-791.
- 401 25. Clark, D.J., Ting, L.H., Zajac, F.E., Neptune, R.R., and Kautz, S.A. (2010). Merging of  
402 healthy motor modules predicts reduced locomotor performance and muscle  
403 coordination complexity post-stroke. *J. Neurophysiol.* *103*, 844-857.
- 404 26. d'Avella, A., and Bizzi, E. (2005). Shared and specific muscle synergies in natural  
405 motor behaviors. *Proc. Natl. Acad. Sci. U. S. A.* *102*, 3076-3081.
- 406 27. Presacco, A., Forrester, L.W., and Contreras-Vidal, J.L. (2012). Decoding intra-limb  
407 and inter-limb kinematics during treadmill walking from scalp electroencephalographic  
408 (EEG) signals. *IEEE Trans. Neural. Syst. Rehabil. Eng.* *20*, 212-219.
- 409 28. Presacco, A., Goodman, R., Forrester, L., and Contreras-Vidal, J.L. (2011). Neural  
410 decoding of treadmill walking from noninvasive electroencephalographic signals. *J.*  
411 *Neurophysiol.* *106*, 1875-1887.
- 412 29. Bradberry, T.J., Gentili, R.J., and Contreras-Vidal, J.L. (2010). Reconstructing  
413 three-dimensional hand movements from noninvasive electroencephalographic signals.  
414 *J. Neurosci.* *30*, 3432-3437.
- 415 30. Nakanishi, Y., Yanagisawa, T., Shin, D., Kambara, H., Yoshimura, N., Tanaka, M.,  
416 Fukuma, R., Kishima, H., Hirata, M., and Koike, Y. (2017). Mapping ECoG channel  
417 contributions to trajectory and muscle activity prediction in human sensorimotor cortex.  
418 *Sci. Rep.* *7*, 45486.
- 419 31. Waldert, S., Preissl, H., Demandt, E., Braun, C., Birbaumer, N., Aertsen, A., and  
420 Mehring, C. (2008). Hand movement direction decoded from MEG and EEG. *J.*  
421 *Neurosci.* *28*, 1000-1008.
- 422 32. Contreras-Vidal, J.L., Bortole, M., Zhu, F., Nathan, K., Venkatakrishnan, A., Francisco,  
423 G.E., Soto, R., and Pons, J.L. (2018). Neural decoding of robot-assisted gait during  
424 rehabilitation after stroke. *Am. J. Phys. Med. Rehabil.* *97*, 541-550.
- 425 33. Chao, Z.C., Nagasaka, Y., and Fujii, N. (2010). Long-term asynchronous decoding of  
426 arm motion using electrocorticographic signals in monkeys. *Front. Neuroeng.* *3*, 3.
- 427 34. Ting, L.H., Chiel, H.J., Trumbower, R.D., Allen, J.L., McKay, J.L., Hackney, M.E., and  
428 Kesar, T.M. (2015). Neuromechanical principles underlying movement modularity and  
429 their implications for rehabilitation. *Neuron* *86*, 38-54.



- 430 35. Neptune, R.R., Clark, D.J., and Kautz, S.A. (2009). Modular control of human walking:  
431 a simulation study. *J. Biomech.* *42*, 1282-1287.
- 432 36. Chvatal, S.A., and Ting, L.H. (2012). Voluntary and reactive recruitment of locomotor  
433 muscle synergies during perturbed walking. *J. Neurosci.* *32*, 12237-12250.
- 434 37. Saltiel, P., d'Avella, A., Wyler-Duda, K., and Bizzi, E. (2015). Synergy temporal  
435 sequences and topography in the spinal cord: evidence for a traveling wave in frog  
436 locomotion. *Brain Struct. Funct.* *221*, 3869-3890.
- 437 38. Drew, T., and Marigold, D.S. (2015). Taking the next step: cortical contributions to the  
438 control of locomotion. *Curr. Opin. Neurobiol.* *33*, 25-33.
- 439 39. Kuo, A.D. (1999). Stabilization of lateral motion in passive dynamic walking. *Int. J.*  
440 *Rob. Res.* *18*, 917-930.
- 441 40. Bulea, T.C., Kim, J., Damiano, D.L., Stanley, C.J., and Park, H.-S. (2015). Prefrontal,  
442 posterior parietal and sensorimotor network activity underlying speed control during  
443 walking. *Front. Hum Neurosci.* *9*, 247.
- 444 41. Van Der Meulen, M., Allali, G., Rieger, S.W., Assal, F., and Vuilleumier, P. (2014).  
445 The influence of individual motor imagery ability on cerebral recruitment during gait  
446 imagery. *Hum. Brain Mapp.* *35*, 455-470.
- 447 42. Wang, C., Wai, Y., Kuo, B., Yeh, Y.-Y., and Wang, J. (2008). *J. Neural. Transm.* *115*,  
448 1149.
- 449 43. Rana, M., Yani, M.S., Asavasopon, S., Fisher, B.E., and Kutch, J.J. (2015). Brain  
450 connectivity associated with muscle synergies in humans. *J. Neurosci.* *35*,  
451 14708-14716.
- 452 44. Hobson, J.A., and Pace-Schott, E.F. (2002). The cognitive neuroscience of sleep:  
453 neuronal systems, consciousness and learning. *Nat. Rev. Neurosci.* *3*, 679.
- 454 45. Nacher, V., Ledberg, A., Deco, G., and Romo, R. (2013). Coherent delta-band  
455 oscillations between cortical areas correlate with decision making. *Proc. Natl. Acad. Sci.*  
456 *U. S. A.* *110*, 15085-90.
- 457 46. Saleh, M., Reimer, J., Penn, R., Ojakangas, C.L., and Hatsopoulos, N.G. (2010). Fast  
458 and slow oscillations in human primary motor cortex predict oncoming behaviorally  
459 relevant cues. *Neuron* *65*, 461-471.
- 460 47. Kuroki, S., Yoshida, T., Tsutsui, H., Iwama, M., Ando, R., Michikawa, T., Miyawaki,  
461 A., Ohshima, T., and Itoharu, S. (2018). Excitatory Neuronal Hubs Configure  
462 Multisensory Integration of Slow Waves in Association Cortex. *Cell Rep.* *22*,  
463 2873-2885.
- 464 48. Hall, T.M., de Carvalho, F., and Jackson, A. (2014). A common structure underlies  
465 low-frequency cortical dynamics in movement, sleep, and sedation. *Neuron* *83*,  
466 1185-1199.
- 467 49. Bouton, C.E., Shaikhouni, A., Annetta, N.V., Bockbrader, M.A., Friedenber, D.A.,  
468 Nielson, D.M., Sharma, G., Sederberg, P.B., Glenn, B.C., and Mysiw, W.J. (2016).  
469 Restoring cortical control of functional movement in a human with quadriplegia. *Nature*  
470 *533*, 247-250.
- 471 50. Muceli, S., Boye, A.T., d'Avella, A., and Farina, D. (2010). Identifying representative  
472 synergy matrices for describing muscular activation patterns during multidirectional  
473 reaching in the horizontal plane. *J. Neurophysiol.* *103*, 1532-1542.
- 474 51. Alibeji, N.A., Kirsch, N.A., and Sharma, N. (2015). A muscle synergy-inspired  
475 adaptive control scheme for a hybrid walking neuroprosthesis. *Fronti. Bioeng. Biotech.*

- 476 3, 203.
- 477 52. Kline, J.E., Huang, H.J., Snyder, K.L., and Ferris, D.P. (2015). Isolating gait-related  
478 movement artifacts in electroencephalography during human walking. *J. Neural Eng.* *12*,  
479 046022.
- 480 53. Mullen, T.R., Kothe, C.A., Chi, Y.M., Ojeda, A., Kerth, T., Makeig, S., Jung, T.-P., and  
481 Cauwenberghs, G. (2015). Real-time neuroimaging and cognitive monitoring using  
482 wearable dry EEG. *IEEE Trans. Biomed. Eng.* *62*, 2553-2567.
- 483 54. Nathan, K., and Contreras-Vidal, J.L. (2016). Negligible motion artifacts in scalp  
484 electroencephalography (EEG) during treadmill walking. *Front. Hum. Neurosci.* *9*, 708.
- 485 55. Bulea, T.C., Prasad, S., Kilicarslan, A., and Contreras-Vidal, J.L. (2014). Sitting and  
486 standing intention can be decoded from scalp EEG recorded prior to movement  
487 execution. *Front. Neurosci.* *8*, 376.
- 488 56. Torres-Oviedo, G., Macpherson, J.M., and Ting, L.H. (2006). Muscle synergy  
489 organization is robust across a variety of postural perturbations. *J. Neurophysiol.* *96*,  
490 1530-1546.
- 491 57. Frere, J., and Hug, F. (2012). Between-subject variability of muscle synergies during a  
492 complex motor skill. *Front. Comput. Neurosci.* *6*, 99.
- 493 58. Yokoyama, H., Hagio, K., Ogawa, T., and Nakazawa, K. (2017). Motor module  
494 activation sequence and topography in the spinal cord during air - stepping in human:  
495 Insights into the traveling wave in spinal locomotor circuits. *Physiol. Rep.* *5*, e13504.
- 496 59. Yokoyama, H., Ogawa, T., Shinya, M., Kawashima, N., and Nakazawa, K. (2017).  
497 Speed dependency in  $\alpha$ -motoneuron activity and locomotor modules in human  
498 locomotion: indirect evidence for phylogenetically conserved spinal circuits. *Proc. R.*  
499 *Soc. B* *284*, 20170290.
- 500 60. Tibshirani, R., Walther, G., and Hastie, T. (2001). Estimating the number of clusters in  
501 a data set via the gap statistic. *J. R. Statist. Soc. B* *63*, 411-423.
- 502 61. Delorme, A., and Makeig, S. (2004). EEGLAB: an open source toolbox for analysis of  
503 single-trial EEG dynamics including independent component analysis. *J. Neurosci.*  
504 *Methods* *134*, 9-21.
- 505 62. Carmena, J.M., Lebedev, M.A., Crist, R.E., O'Doherty, J.E., Santucci, D.M., Dimitrov,  
506 D.F., Patil, P.G., Henriquez, C.S., and Nicolelis, M.A. (2003). Learning to control a  
507 brain-machine interface for reaching and grasping by primates. *Plos Biol.* *1*, e42.
- 508 63. Corey, D.M., Dunlap, W.P., and Burke, M.J. (1998). Averaging correlations: Expected  
509 values and bias in combined Pearson  $r$ s and Fisher's  $z$  transformations. *J. Gen. Psychol.*  
510 *125*, 245-261.
- 511 64. Theiler, J., Eubank, S., Longtin, A., Galdrikian, B., and Farmer, J.D. (1992). Testing for  
512 nonlinearity in time series: the method of surrogate data. *Phys. D* *58*, 77-94.
- 513  
514  
515  
516  
517  
518  
519

## 520 **Figure legends**

521 **Figure 1.** EEG electrode montage corresponding to the international 10-20 system.

522

523 **Figure 2.** Schematic diagram depicting the neural decoding of locomotor muscle synergy and  
524 individual muscle activations from simultaneously recorded EEG signals. Examples of 8  
525 seconds of raw EMG signals, EMG envelopes, muscle synergies, pre- and post-artifact removal  
526 EEG signal from an electrode, and slow cortical potentials in the delta band are shown.

527

528 **Figure 3.** Five extracted types of locomotor muscle synergies. Average muscle weightings  
529 (bars) and corresponding temporal activation patterns (waveforms) across participants in each  
530 type of locomotor muscle synergy are shown. Each bar height represents the relative level of  
531 activation of each muscle synergy. An enlarged view of the x-axis is shown at the bottom. Lines  
532 indicate the temporal activation patterns of the muscle synergies. Thick lines indicate average  
533 temporal activation patterns, while thin lines indicate their standard deviations (SD).

534

535 **Figure 4.** Typical examples of decoded and actual muscle synergy activations (A) and  
536 individual muscle activations (B) from a participant. Red and blue waveforms indicate decoded  
537 and actual activation patterns, respectively. Bars represent muscle synergy.

538

539 **Figure 5.** Decoding accuracy of activation of muscle synergies and individual muscles. (A)  
540 Decoding accuracy (correlation coefficient) for each muscle synergy type (left) and EMG  
541 envelope of an individual muscle (right). The mean and SD across participants are shown. (B)  
542 Overall decoding accuracy for muscle synergy decoders and individual muscle decoders. Mean  
543 values across participants (black) and each participants' data (gray) are shown. (C) Decoding  
544 accuracy when EEG phase was scrambled. The bars indicate the participant's mean of means  
545 and the upper ends of the 95% confidence interval obtained from the distribution of the

546 surrogate datasets of EEG signals.

547

548 **Figure 6.** Relationships between muscle synergy decoders and individual muscle decoders.

549 (A) A schematic flow diagram illustrating directly decoded muscle activity and indirectly  
550 decoded muscle activity reconstructed from decoded muscle synergies. (B) Relationships of  
551 decoding accuracy in each individual muscle activity between those directly decoded from  
552 individual muscle decoders and those indirectly decoded from muscle synergy activations  
553 decoded from muscle synergy decoders. Each plot indicates the value of an individual muscle  
554 from a participant. (C) Schematic diagram of reconstruction of weights of an individual muscle  
555 decoder from those of muscle synergy decoders. (D) Similarity of weights of individual muscle  
556 decoders between the originals and those reconstructed from weights of muscle synergy  
557 decoders. The mean and SD across participants are shown.

558

559 **Figure 7.** Contribution of each electrode to the decoding of muscle synergy.

560 (A) Examples of contributions of each electrode to decoding from a participant (B) Mean  
561 contribution of each electrode in each synergy type. The error bars indicate the SD (C) Scalp  
562 map indicating the electrodes included in each region of interest (ROI) to examine the  
563 contributions from different cortical regions to decoding. (D) Decoding accuracy by each ROI  
564 and all electrodes. Data are represented as mean  $\pm$  SEM. Asterisks indicate significant  
565 differences (\*:  $p < 0.05$ , \*\*:  $p < 0.01$ , FDR corrected for multiple comparisons, See also Table  
566 S2–S6 for detailed statistical values).

567

568

569

Figure 1

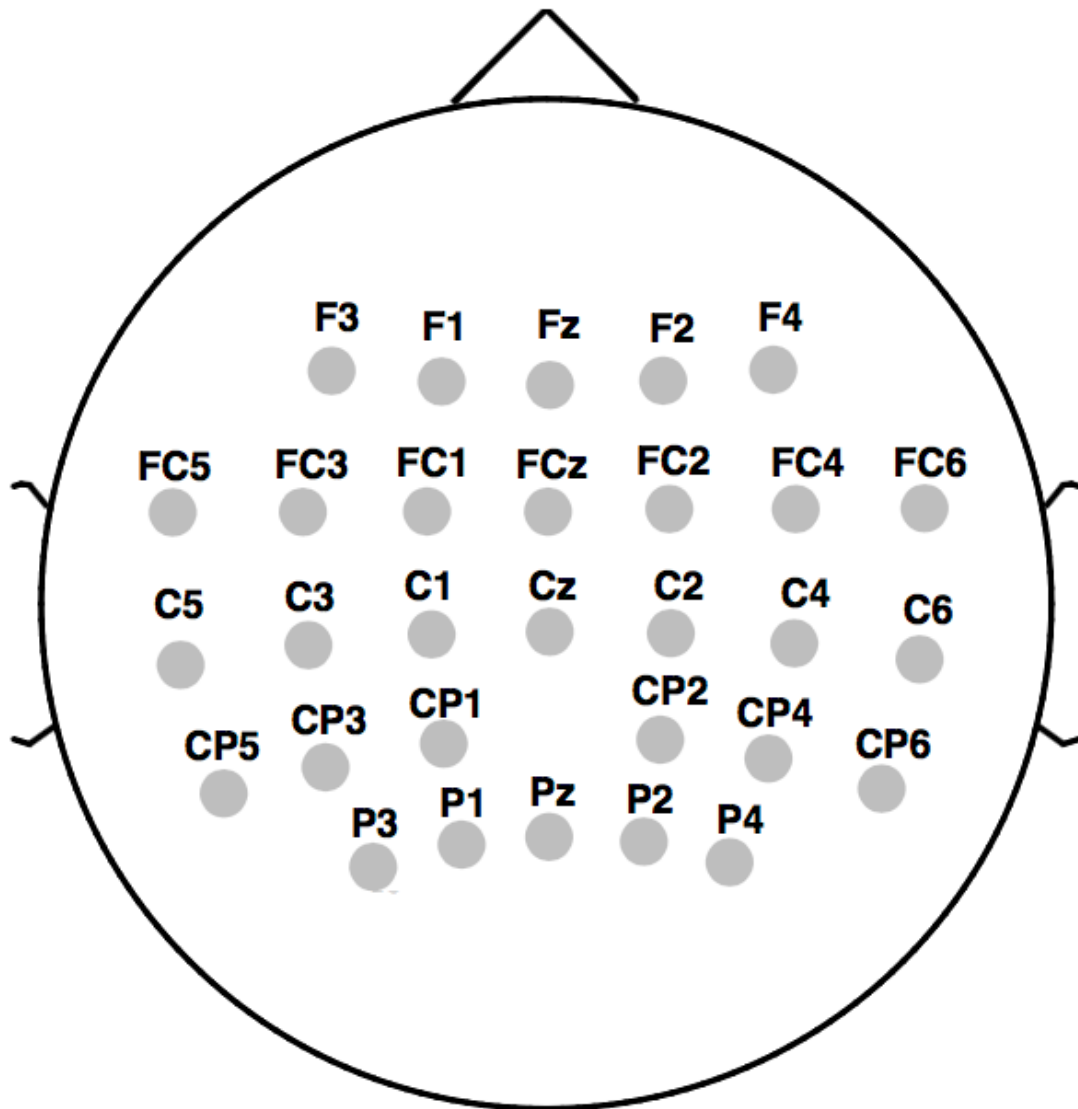

570

571

572  
573

Figure 2

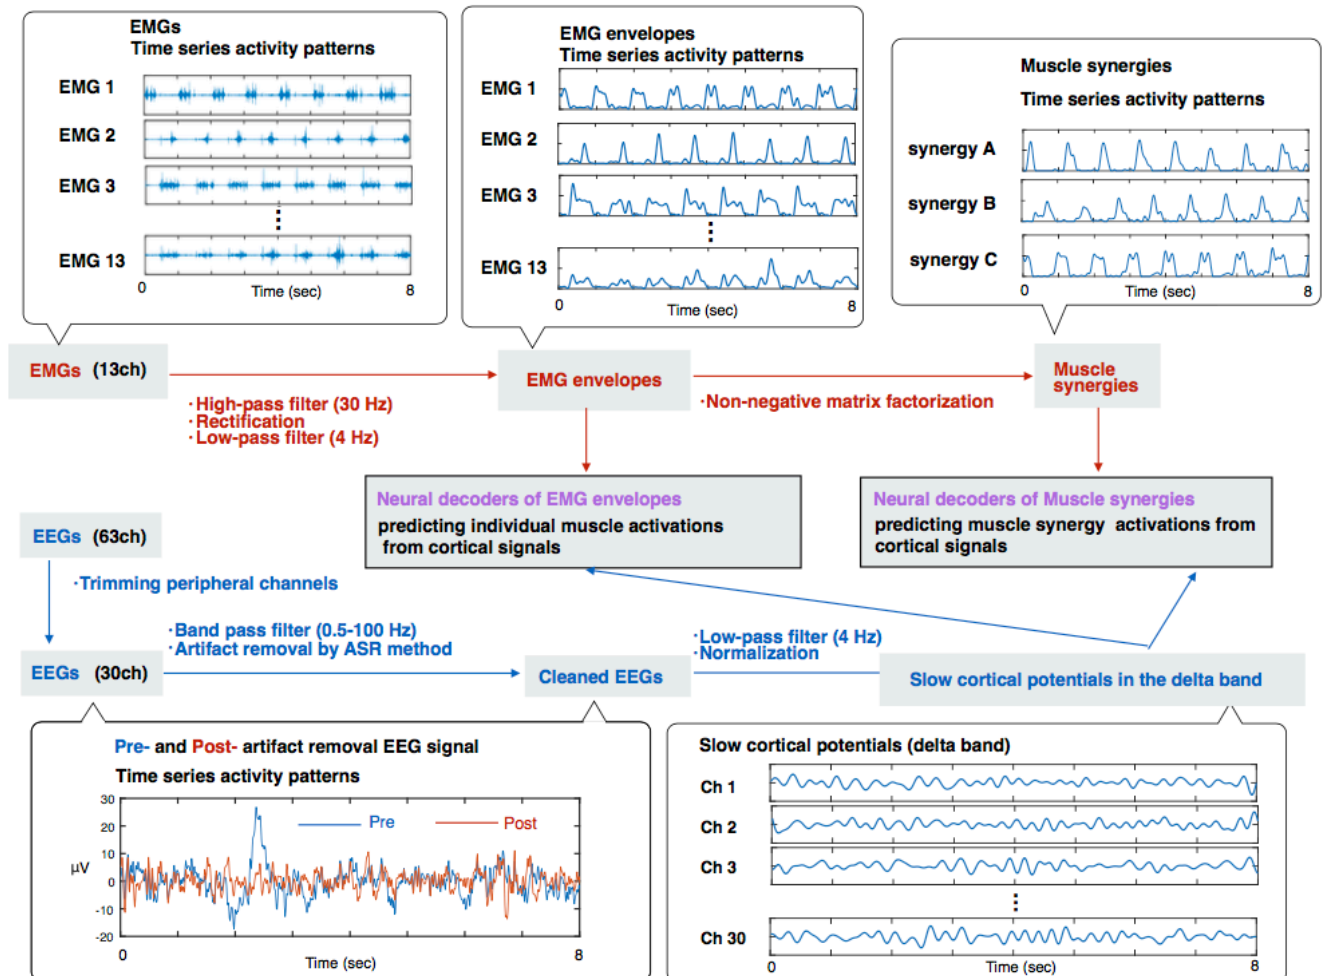

574

Figure 3

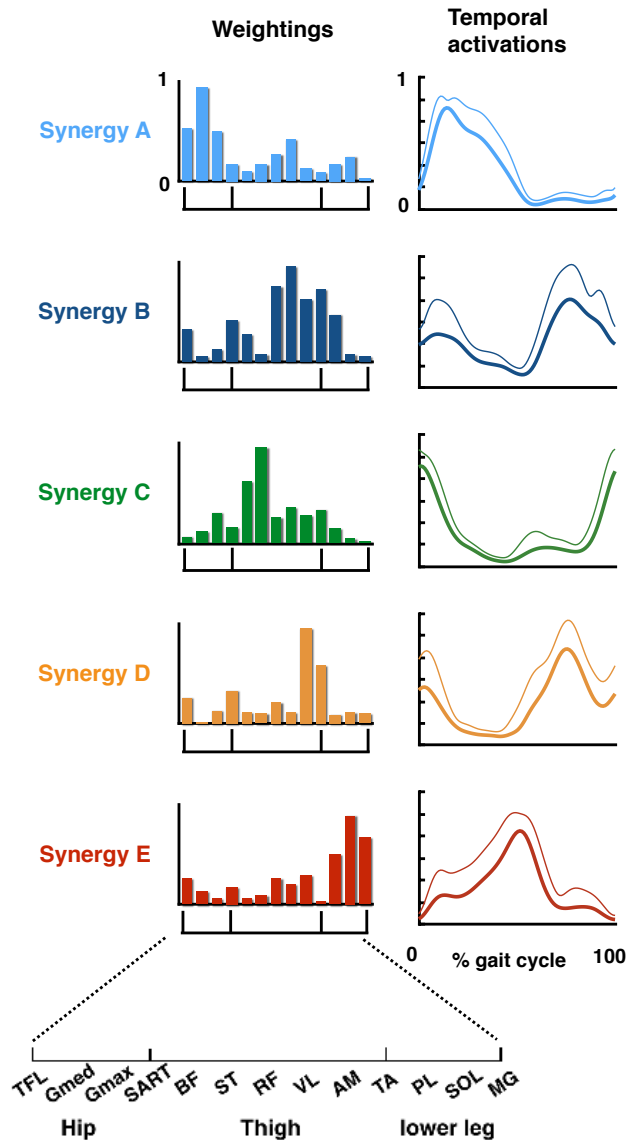



575  
576

Figure 4

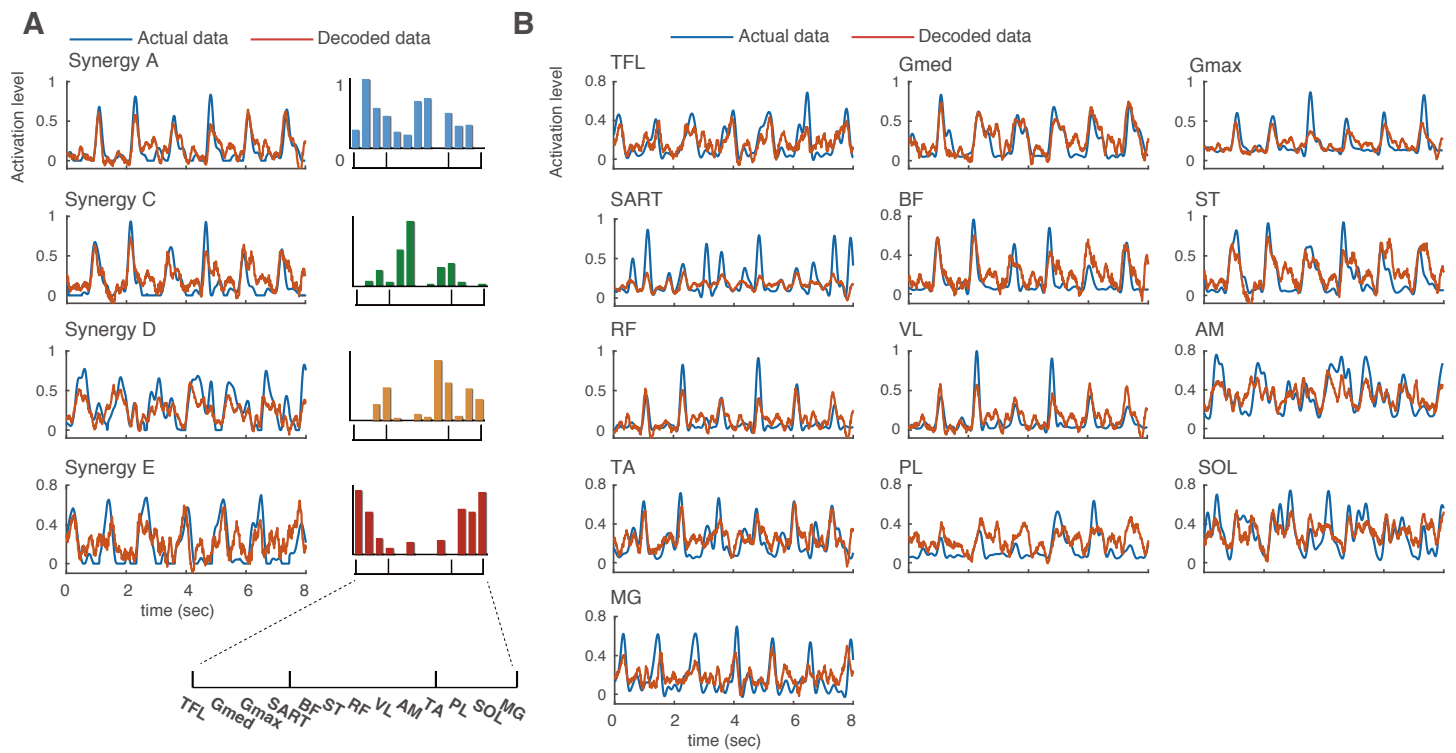

577

578

579

**Figure 5**

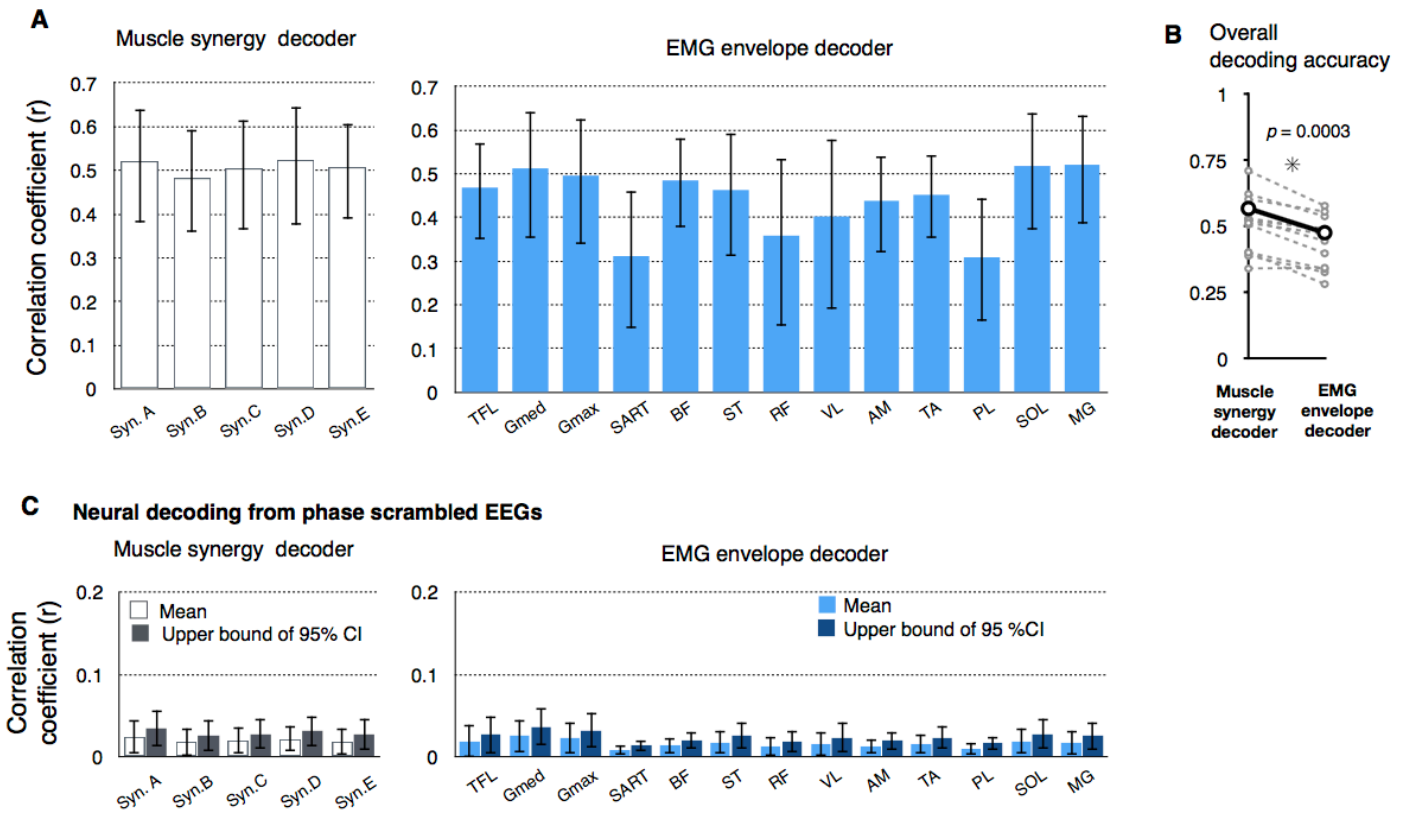

580

581

582

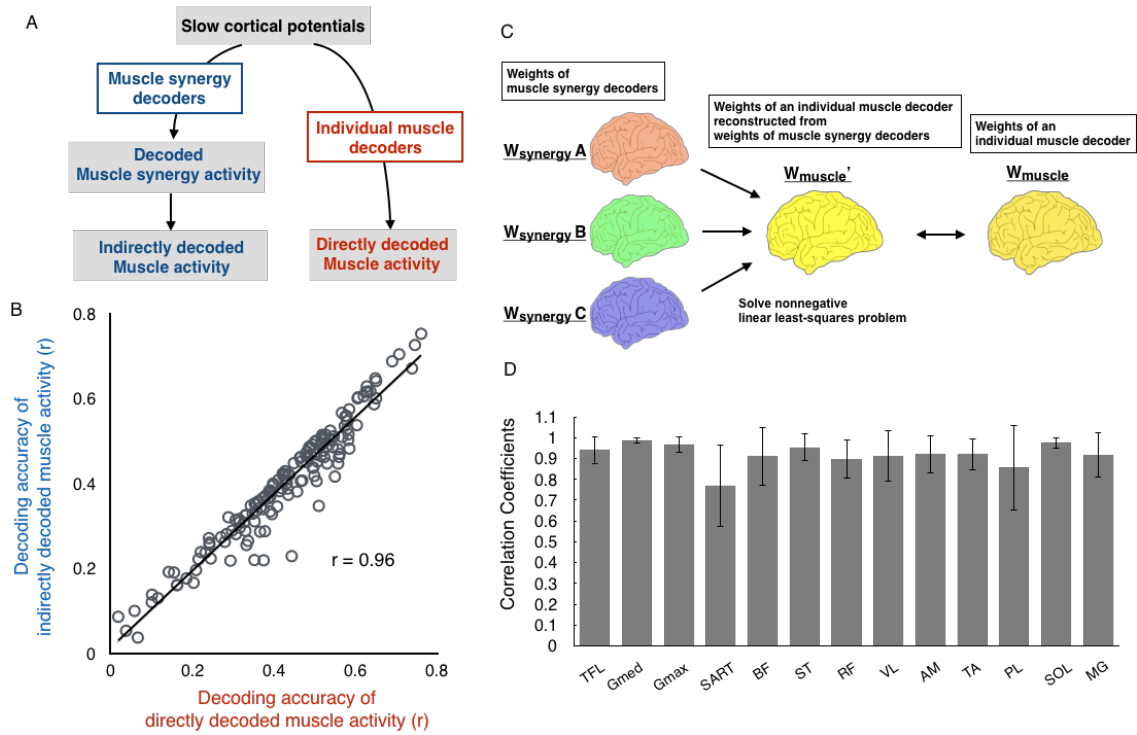

583

584

585

586  
587  
588

Figure 7

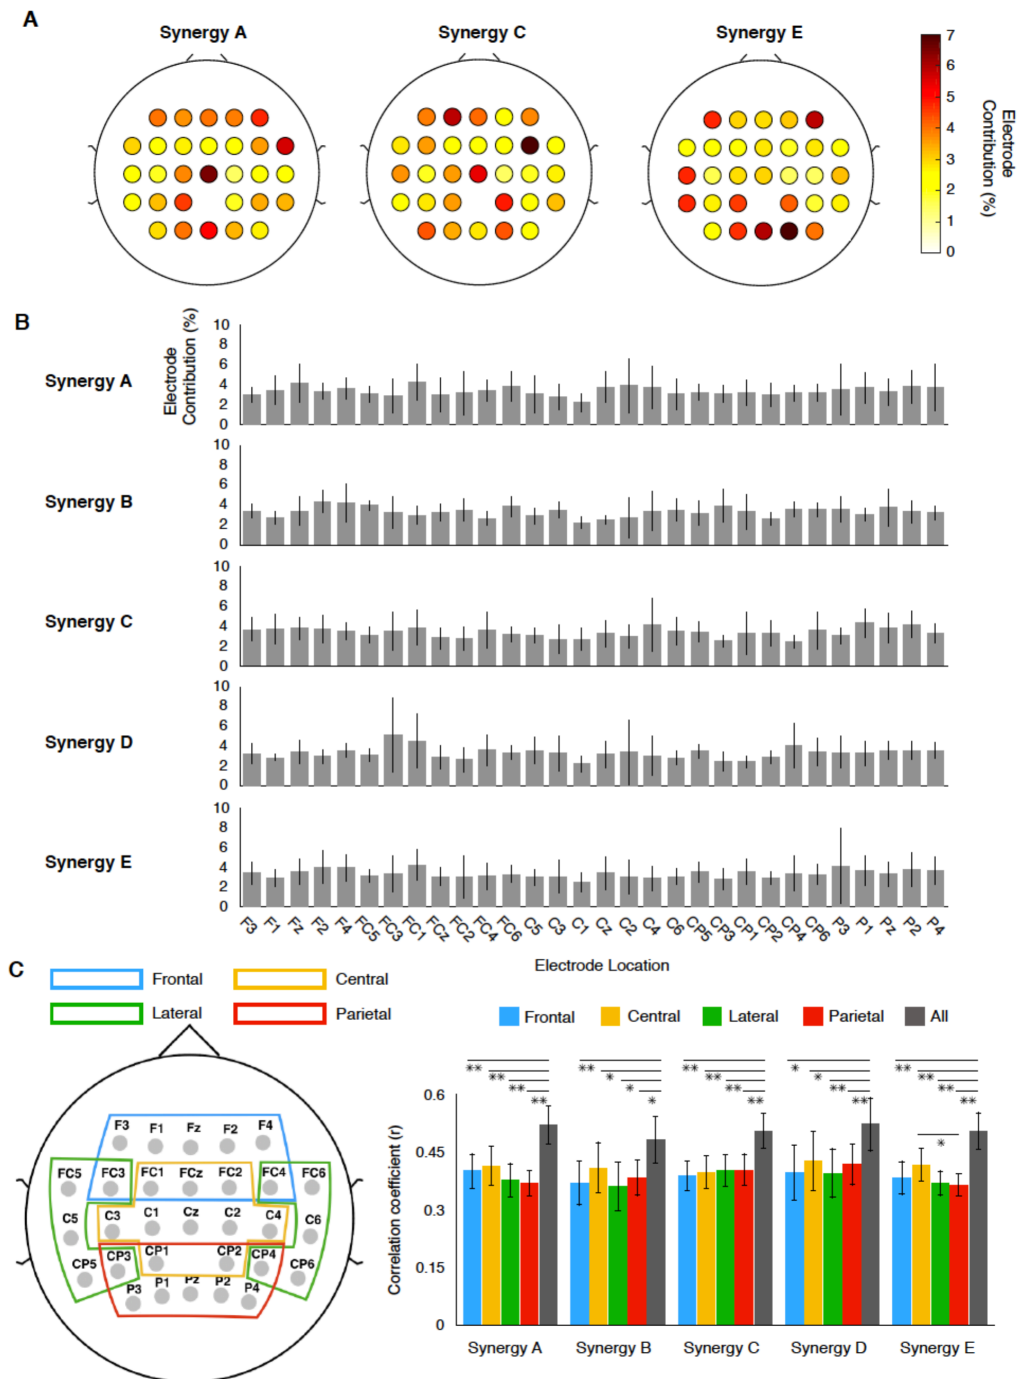

589

590

## 591 **Methods**

592

### 593 **Experimental model and subject details**

#### 594 **Participants**

595 Twelve healthy male volunteers (age, 23–31 years) participated in this study. Each participant  
596 provided written informed consent. The experiments were performed in accordance with the  
597 Declaration of Helsinki and with the approval of the Ethics Committee of the Graduate School  
598 of Arts and Sciences, University of Tokyo.

599

#### 600 **Method details**

##### 601 **Experimental design and setup**

602 Participants walked on a treadmill (Bertec, Columbus, OH, USA) at 0.55 m/s for 7 min 30  
603 seconds. The last seven minutes of data were used for the analysis. The slow walking speed was  
604 chosen based on two previous studies examining the effects of walking speed on movement  
605 artifacts in EEG signals [52, 54]: Kline et al. [52] used an experimental method to isolate and  
606 record independent movement artifacts with a silicone swim cap (nonconductive material), and  
607 reported large movement artifacts at walking speeds faster than 0.8 m/s. A study that analyzed  
608 relationships between head acceleration and motion artifacts in EEG signals indicated that  
609 recordings were robust at gait speeds below 3.0 km/h (0.83 m/s) [54]. As a static baseline  
610 condition, the participants sat on a chair for two minutes.

611

##### 612 **Data collection**

613 Three-dimensional ground reaction forces (GRF) were recorded from force plates under the  
614 right and left belts of the treadmill (sampling rate: 1000 Hz). GRF data were smoothed with a  
615 low-pass filter (zero-lag Butterworth filter, 5 Hz cutoff). MATLAB 2016b (MathWorks, Natick,

616 MA, USA) was used to perform all the post-processing analyses offline.

617           Surface electromyographic (EMG) signals were recorded from the following 13 leg  
618 muscles on the right side using a wireless EMG system (Trigno Wireless System, DelSys Inc.,  
619 Boston, MA, USA): tensor fasciae latae (TFL), gluteus maximus (GM), gluteus medius (Gmed),  
620 sartorius (SART), biceps femoris (BF), semitendinosus (ST), rectus femoris (RF), vastus  
621 lateralis (VL), adductor magnus (AM), tibialis anterior (TA), peroneus longus (PL), soleus  
622 (SOL), and gastrocnemius medialis (MG). EMGs were amplified (with 300 gain preamplifier),  
623 band-pass filtered (20–450 Hz), and sampled at 1000 Hz.

624           A 64-channel EEG cap (Waveguard original, ANT Neuro b.v., Enschede,  
625 Netherlands) and a mobile EEG amplifier (eego sports, ANT Neuro b.v., Enschede,  
626 Netherlands) were used to record EEG signals at a sampling frequency of 500 Hz. Arrangement  
627 of the electrodes was according to the international 10–20 electrode system. EEG signals were  
628 referenced to CPz and a ground electrode was placed on AFz. Electrode impedances were kept  
629 below 30 k $\Omega$  (10 k $\Omega$  in most electrodes), which was substantially below the recommended  
630 impedance (below 50 k $\Omega$ ) for the high-impedance EEG amplifier. Peripheral channels, which  
631 are prone to contamination by facial/cranial muscle activity and eye blinks, were removed from  
632 the offline analysis (channels labeled Fp, AF, FT, T, TP, O, PO, and F5-8, P5-8) [55], resulting  
633 in the 30 channels presented in Figure 1.

634

### 635 **EMG processing and extraction of locomotor muscle synergies**

636 Figure 2 shows an overview of our decoding methodology. From the recorded EMG signals,  
637 EMG envelopes and muscle synergies were used for the neural decoding analysis.

638           First, the recorded EMG data were high-pass filtered (zero-lag fourth-order  
639 Butterworth at 30 Hz), demeaned, full-wave rectified, and smoothed with a low-pass filter  
640 (zero-lag fourth-order Butterworth at 4 Hz cutoff) to obtain EMG envelopes [25]. EMG  
641 envelopes were resampled at 100 Hz. The amplitude of EMG envelopes for each muscle was

642 normalized to the maximum value for that muscle during the walking task. Muscle synergies  
643 were extracted from the processed EMG envelopes using non-negative matrix factorization  
644 (NMF) [2, 3, 24-26]. For each participant, muscle synergies were extracted from the EMG  
645 dataset organized as a matrix with 13 muscles  $\times$  42000 variables (i.e., 100 Hz  $\times$  420 sec [7  
646 min]). Using NMF, the EMG matrix ( $M$ ) was decomposed into spatial muscle weightings ( $W$ ),  
647 which correspond to the muscle synergies and their temporal activations ( $C$ ) according to  
648 formula (1):

$$M = S \cdot C + E \quad (1)$$

649 where  $M$  ( $m \times t$  matrix, where  $m$  is the number of muscles and  $t$  is the number of samples in the  
650 EMG data matrix) is a linear combination of muscle synergies,  $S$  ( $m \times N_{synergy}$  matrix, where  
651  $N_{synergy}$  is the number of muscle synergies), and their temporal activation patterns,  $C$  ( $N_{synergy} \times t$   
652 matrix), and  $E$  is the residual error matrix. The number of muscle synergies,  $N_{synergy}$ , was  
653 determined by iterating each possible  $N_{synergy}$  from 1 to 10. For each  $N_{synergy}$ , the goodness of fit  
654 was evaluated based on the variance accounted for (VAF) [56]. Based on the VAF, the optimal  
655  $N_{synergy}$  was defined as the minimum value fulfilling two criteria: (1) the number of muscle  
656 synergies achieving VAF  $>$  90% [56], and (2) the number to which adding an additional muscle  
657 synergy did not increase VAF by  $>$  5% [57]. Then, we clustered the extracted muscle synergies  
658 using hierarchical clustering analysis to examine the extracted types of muscle synergies  
659 (Ward's method, correlation distance) based on muscle weightings, as in our previous studies [3,  
660 58, 59]. The gap statistic method was used to define the optimal number of clusters [60].

661

## 662 **EEG pre-processing**

663 In the current study, fluctuations in the amplitude of slow cortical potentials (0.5 – 4 Hz in the  
664 time domain) were used for the neural decoding analysis (Figure 2) based on a similar  
665 methodology used in previous studies [27-30, 32]. EEG data analysis was performed using  
666 custom programs in MATLAB incorporating functions of EEGLAB 14.1b [61]. The EEG

667 signals were band-pass filtered between 0.5–100 Hz with a Butterworth filter (fourth-order).  
668 The “cleanline” function in EEGLAB was used to remove power line noise (50 Hz). Next, the  
669 EEG signals were resampled at 100 Hz. Then, we checked noisy EEG channels based on two  
670 criteria adopted from a previous study (Gwin et al., 2011): 1) standard deviation greater than  
671 1000  $\mu\text{V}$ , and 2) kurtosis of more than five standard deviations from the mean. In this study, no  
672 EEG electrode satisfied the criteria in all the participants. Since various types of artifacts were  
673 potentially introduced in the EEG data, we used an artifact rejection method called Artifact  
674 Subspace Reconstruction (ASR) [53] in EEGLAB to remove artifacts derived from walking,  
675 eye blinks, muscle, and heart activity. Next, the cleaned EEG signals were low-pass filtered at 4  
676 Hz with a zero-phase Butterworth filter (fourth-order) and re-referenced to a common average  
677 reference. Finally, the amplitude of each electrode was normalized by calculating the standard  
678 z-score.

679

## 680 **Neural decoding of muscle synergy and individual muscle activation**

681 To continuously decode the activation of muscle synergies and individual muscles from the  
682 slow cortical potentials, we designed a time-embedded (10 lags, corresponding to 0 ms to -90  
683 msec) linear decoding model, called the Wiener filter [28, 29, 62], for the muscle synergy and  
684 EMG envelope data. The linear model is given by:

$$y(t) = b + \sum_{i=1}^{N_{electrode}} \sum_{j=1}^L W_{ij} \cdot x_i[t - (j - 1)] + e(t) \quad (2)$$

685 where  $y(t)$  is the predicted time series activation of each muscle synergy or EMG envelope at  
686 time  $t$ ,  $b$  is the intercept,  $N_{electrode}$  ( $= 30$ ) is the number of electrodes,  $L$  ( $=10$ ) is the number of  
687 time lags,  $x(t)$  is the normalized slow cortical potentials at electrode  $i$  at time  $t$ ,  $W_{ij}$  is the weights  
688 at electrode  $i$  and time lag  $j$ , and  $e(t)$  is the residual error. The parameters of the model were  
689 calculated with multidimensional generalized linear regression [28, 29, 62] using the “glm”



690 function in MATLAB (Gaussian distribution condition). Neural decoders were designed  
691 separately for each participant and each decoded parameter (i.e., each muscle synergy and each  
692 EMG envelope).

693 For assessing the predictive accuracy of each decoder, a seven-fold cross-validation  
694 procedure was performed. Thus, the data recorded during the 7 min walking task were divided  
695 into 7 segments (1 min each). Six segments were used for training data while the remaining  
696 segment was used for testing the decoding model. This procedure was repeated for all possible  
697 combinations (i.e., seven times). Correlation coefficients ( $r$ ) were calculated between the real  
698 activation and the decoded activation at each decoder in each iteration. To compare the overall  
699 decoding accuracy between the two types of decoders (muscle synergy decoders vs. individual  
700 muscle decoders), overall correlation values were calculated for each type per participant. To  
701 minimize the effects of skewness in the sampling distributions on the correlation coefficients,  
702 each correlation coefficient value was averaged after Fisher's Z-transformation [63]. After  
703 averaging, the Z-values were back-transformed to the scale of Pearson's  $r$  values.

704 Chance levels of neural decoding were evaluated by scrambling the EEG phase [64].  
705 Phase-randomized EEG signals were generated by performing Fourier transform of a time series,  
706 and then the inverse Fourier transform was performed. The same decoding procedure was  
707 performed using the phase-randomized EEG signals. We generated 100 phase-randomized EEG  
708 datasets for each participant and performed neural decoding using each randomized dataset to  
709 obtain confidence intervals for the decoding accuracy.

710

## 711 **Analysis of relationships between muscle synergy decoders and individual muscle** 712 **decoders**

713 We reconstructed individual muscle activations by summing the outputs of each  
714 decoded muscle synergy to test whether the variability in decoding accuracy in individual  
715 muscles would be reproduced by individual muscle activations indirectly decoded from muscle

716 synergy activations decoded from muscle synergy decoders. The output of a decoded muscle  
717 synergy was explained by the product of the muscle weighting component and the decoded  
718 temporal activation pattern from the slow cortical potentials. Next, the decoding accuracy of the  
719 indirectly decoded individual muscle activation through the decoded muscle synergies were  
720 assessed.

721 To examine the weight of each muscle decoder ( $W_{muscle}$ ) based on those of the muscle  
722 synergy decoders ( $W_{syn}$ ), a 300-dimensional weight of an individual muscle decoder was  
723 reconstructed as a linear combination of the weights of the muscle synergy decoders with  
724 non-negative coefficients ( $W_{muscle}'$ , conceptual schema presented in Figure 6C). The  
725 non-negative least squares problem was solved by the “lsqnonneg” function in MATLAB. The  
726 similarity of the weights of the original and reconstructed individual muscle decoders (i.e.,  
727  $W_{muscle}$  and  $W_{muscle}'$ , respectively) was evaluated by Pearson’s r.

728

## 729 **Contribution of each electrode to decoding**

730 To evaluate the spatial contributions of cortical activity to predict muscle synergy activations,  
731 we calculated the contribution of each electrode from the weights of the decoding model as  
732 determined in a previous study [33]:

$$\%T_k = \frac{\sum_{j=1}^L |w_{kj}|}{\sum_{i=1}^{N_{electrode}} \sum_{j=1}^L |w_{ij}|} \times 100; \quad (3)$$

733 for all  $k$  from 1 to  $N_{electrode}$ , where  $\%T_k$  is the percentage contribution of each EEG electrode  $k$ .

734 In addition, we divided the electrodes into four major ROIs to examine the  
735 individual contribution of each area to the decoding. The ROIs were the frontal area (F3, F1, Fz,  
736 F2, F4, FC3, FC1, FCz, FC2, and FC4), central area (FC1, FCz, FC2, C3, C1, Cz, C2, C4, CP1,  
737 and CP2), lateral area (FC5, FC3, FC4, FC6, C5, C6, CP5, CP3, CP4, and CP6), and parietal  
738 area (CP3, CP1, CP2, CP4, P3, P1, Pz, P2, and P4). Using the same procedure as for the full  
739 electrodes, the decoding accuracy of each muscle synergy activation was separately calculated

740 using the electrode set in each ROI.

741

## 742 **Quantification and statistical analysis**

743 The differences between the overall correlation values (i.e., decoding accuracy) between the two

744 types of decoders (muscle synergy decoder vs. individual muscle decoder) were assessed using

745 two-tailed paired t-tests. In addition, the differences in decoding accuracy between each ROI

746 and the full electrode set were compared using repeated measures one-way analysis of variance

747 (ANOVA) test with multiple t-tests with FDR correction for each muscle synergy type. For the

748 statistical tests, the correlation values were transformed into Z-values using Fisher's

749 Z-transformation and the tests (i.e., t-test, ANOVA, multiple t-tests with FDR correction) were

750 conducted on the Fisher's Z-values. Statistical significance was set at  $p < 0.05$ .

751

752

753
